# Supplementary material for: Insulin Dose and Cardiovascular Mortality in the ACCORD Trial
Source: Oxford University Press journal article supplement (doi:10.2337/dc15-0598), 2015-10-12
Supplement: dc150598supplementarydata.pdf [file dc150598supplementarydata.pdf]

SUPPLEMENTARY DATA

**Supplementary Table 1. Comparison of baseline characteristics between subjects who were prescribed insulin during the study and those who were not (Intensive Arm)**

| <b>Baseline characteristics</b>                     | <b>Insulin prescribed during study</b> | <b>No insulin prescribed during study</b> | <b>p-value</b> |
|-----------------------------------------------------|----------------------------------------|-------------------------------------------|----------------|
| n                                                   | 4003                                   | 1083                                      |                |
| Age (years)                                         | 62.2 ± 6.8                             | 62.4 ± 6.9                                | 0.439          |
| Female                                              | 1523 (38.0%)                           | 440 (40.6%)                               | 0.122          |
| Race/ethnicity                                      |                                        |                                           | <0.001         |
| AA                                                  | 788 (19.7%)                            | 197 (18.2%)                               |                |
| Hispanic                                            | 253 (6.3%)                             | 102 (9.4%)                                |                |
| Other                                               | 397 (9.9%)                             | 157 (14.5%)                               |                |
| Non-Hispanic white                                  | 2565 (64.1%)                           | 627 (57.9%)                               |                |
| Diabetes duration                                   |                                        |                                           | <0.001         |
| ≤5 years                                            | 909 (22.7%)                            | 553 (51.1%)                               |                |
| 6-10 years                                          | 1160 (29.0%)                           | 300 (27.7%)                               |                |
| 11-15 years                                         | 876 (21.9%)                            | 135 (12.5%)                               |                |
| ≥16 years                                           | 1058 (26.4%)                           | 95 (8.8%)                                 |                |
| History of cardiovascular disease (yes vs. no)      | 1498 (37.4%)                           | 313 (28.9%)                               | <0.001         |
| Prior myocardial infarction (yes vs. no)            | 183 (4.6%)                             | 39 (3.6%)                                 | 0.166          |
| Heart failure/congestive heart failure (yes vs. no) | 219 (5.5%)                             | 27 (2.5%)                                 | <0.001         |
| Retinal surgery (yes vs. no)                        | 398 (9.9%)                             | 26 (2.4%)                                 | <0.001         |
| Amputation (yes vs. no)                             | 81 (2.0%)                              | 10 (0.9%)                                 | 0.015          |
| Education                                           |                                        |                                           | 0.151          |
| Less than high school                               | 619 (15.5%)                            | 178 (16.4%)                               |                |
| High school graduate                                | 1065 (26.6%)                           | 262 (24.2%)                               |                |
| Some college                                        | 1319 (33.0%)                           | 343 (31.7%)                               |                |
| College graduate or more                            | 1000 (25.0%)                           | 300 (27.7%)                               |                |
| Smoking                                             |                                        |                                           | 0.044          |

SUPPLEMENTARY DATA

| <b>Baseline characteristics</b>            | <b>Insulin prescribed during study</b> | <b>No insulin prescribed during study</b> | <b>p-value</b> |
|--------------------------------------------|----------------------------------------|-------------------------------------------|----------------|
| Former                                     | 1810 (45.2%)                           | 449 (41.5%)                               |                |
| Current                                    | 568 (14.2%)                            | 150 (13.9%)                               |                |
| Never                                      | 1625 (40.6%)                           | 484 (44.7%)                               |                |
| Alcohol use                                |                                        |                                           | 0.261          |
| 1-6 drinks/week                            | 3068 (76.7%)                           | 814 (75.2%)                               |                |
| 7+ drinks/week                             | 760 (19.0%)                            | 210 (19.4%)                               |                |
| No drinks/week                             | 173 (4.3%)                             | 59 (5.4%)                                 |                |
| Insulin use (yes vs. no)                   | 1733 (43.3%)                           | 4 (0.4%)                                  | <0.001         |
| ACE inhibitor (yes vs. no)                 | 2172 (54.3%)                           | 525 (48.5%)                               | <0.001         |
| Angiotensin receptor blockers (yes vs. no) | 639 (16.0%)                            | 151 (13.9%)                               | 0.103          |
| Statins (yes vs. no)                       | 2534 (63.3%)                           | 605 (55.9%)                               | <0.001         |
| Metformin (yes vs. no)                     | 2430 (60.7%)                           | 603 (55.7%)                               | 0.003          |
| Sulfonylureas (yes vs. no)                 | 2037 (50.9%)                           | 552 (51.0%)                               | 0.962          |
| Thiazolidinediones (yes vs. no)            | 856 (21.4%)                            | 132 (12.2%)                               | <0.001         |
| BMI (kg/m <sup>2</sup> )                   | 32.3 ± 5.5                             | 31.8 ± 5.5                                | 0.007          |
| Systolic blood pressure (mmHg)             | 136.2 ± 17.0                           | 136.1 ± 16.9                              | 0.842          |
| Diastolic blood pressure (mmHg)            | 74.3 ± 10.6                            | 76.4 ± 10.4                               | <0.001         |
| Visual acuity                              |                                        |                                           | 0.052          |
| <20/40                                     | 931 (24.4%)                            | 221 (21.4%)                               |                |
| 20/20-20/40                                | 2305 (60.5%)                           | 630 (61.1%)                               |                |
| ≥20/20                                     | 577 (15.1%)                            | 180 (17.5%)                               |                |
| Peripheral neuropathy (yes vs. no)         | 1774 (44.3%)                           | 378 (34.9%)                               | <0.001         |
| Heart rate                                 | 72.9 ± 11.8                            | 72.1 ± 11.6                               | 0.056          |
| Q-T index                                  | 101.9 ± 5.2                            | 101.3 ± 4.9                               | 0.002          |
| A1C in % ( mmol/mol)                       | 8.4 ± 1.1<br>(68 ± 12.0)               | 7.9 ± 1.0<br>(63 ± 10.9)                  | <0.001         |
| Fasting plasma glucose (mg/dl)             | 177.2 ± 57.4                           | 166.6 ± 48.8                              | <0.001         |

SUPPLEMENTARY DATA

| <b>Baseline characteristics</b>                               | <b>Insulin prescribed during study</b> | <b>No insulin prescribed during study</b> | <b>p-value</b> |
|---------------------------------------------------------------|----------------------------------------|-------------------------------------------|----------------|
| LDL (mg/dl)                                                   | 104.3 ± 33.8                           | 107.2 ± 34.5                              | 0.015          |
| HDL (mg/dl)                                                   | 41.9 ± 11.8                            | 41.5 ± 11.5                               | 0.326          |
| Triglycerides (mg/dl)                                         | 190.4 ± 145.7                          | 193.3 ± 156.5                             | 0.579          |
| Serum creatinine (mg/dl)                                      | 0.9 ± 0.2                              | 0.9 ± 0.2                                 | <0.001         |
| Urinary albumin-to-creatinine ratio (mg/mg)                   |                                        |                                           | <0.001         |
| <30                                                           | 2647 (66.1%)                           | 828 (76.5%)                               |                |
| 30-≤300                                                       | 1072 (26.8%)                           | 210 (19.4%)                               |                |
| >300                                                          | 284 (7.1%)                             | 45 (4.2%)                                 |                |
| Integrated health plan (yes vs. no)                           | 1633 (40.8%)                           | 397 (36.7%)                               | 0.018          |
| Endocrinologist or diabetologist (either vs. other physician) | 2299 (57.4%)                           | 528 (48.8%)                               | <0.001         |
| Certified diabetes educator on staff at randomization         | 1625 (40.6%)                           | 347 (32.0%)                               | <0.001         |
| Site size                                                     |                                        |                                           | 0.388          |
| <100                                                          | 618 (15.4%)                            | 181 (16.7%)                               |                |
| 100-150                                                       | 1175 (29.4%)                           | 328 (30.3%)                               |                |
| >150                                                          | 2210 (55.2%)                           | 574 (53.0%)                               |                |

Values are “means ± SD” for continuous variables or “n (%)” for categorical variables.

The sample size for Q-T index is 983 for those who were never prescribed insulin and 3587 for those who were prescribed insulin. The sample size for A1C is 1081 for those who were never prescribed insulin and 3997 for those who were prescribed insulin.

SUPPLEMENTARY DATA

**Supplementary Table 2. Comparison of baseline characteristics between subjects who were prescribed insulin during the study and those who were not (Standard Arm)**

| <b>Baseline characteristics</b>                     | <b>Insulin prescribed during study</b> | <b>No insulin prescribed during study</b> | <b>p-value</b> |
|-----------------------------------------------------|----------------------------------------|-------------------------------------------|----------------|
| n                                                   | 3135                                   | 1942                                      |                |
| Age (years)                                         | 62.0 ± 6.8                             | 62.6 ± 6.8                                | 0.004          |
| Female                                              | 1199 (38.2%)                           | 744 (38.3%)                               | 0.963          |
| Race/ethnicity                                      |                                        |                                           | <0.001         |
| AA                                                  | 603 (19.2%)                            | 339 (17.5%)                               |                |
| Hispanic                                            | 221 (7.0%)                             | 151 (7.8%)                                |                |
| Other                                               | 291 (9.3%)                             | 265 (13.6%)                               |                |
| Non-Hispanic white                                  | 2020 (64.4%)                           | 1187 (61.1%)                              |                |
| Diabetes duration                                   |                                        |                                           | <0.001         |
| ≤5 years                                            | 572 (18.2%)                            | 862 (44.4%)                               |                |
| 6-10 years                                          | 863 (27.5%)                            | 591 (30.4%)                               |                |
| 11-15 years                                         | 754 (24.1%)                            | 269 (13.9%)                               |                |
| ≥16 years                                           | 946 (30.2%)                            | 220 (11.3%)                               |                |
| History of cardiovascular disease (yes vs. no)      | 1200 (38.3%)                           | 565 (29.1%)                               | <0.001         |
| Prior myocardial infarction (yes vs. no)            | 159 (5.1%)                             | 90 (4.6%)                                 | 0.483          |
| Heart failure/congestive heart failure (yes vs. no) | 197 (6.3%)                             | 48 (2.5%)                                 | <0.001         |
| Retinal surgery (yes vs. no)                        | 387 (12.3%)                            | 79 (4.1%)                                 | <0.001         |
| Amputation (yes vs. no)                             | 74 (2.4%)                              | 19 (1.0%)                                 | <0.001         |
| Education                                           |                                        |                                           | 0.342          |
| Less than high school                               | 419 (13.4%)                            | 285 (14.7%)                               |                |
| High school graduate                                | 845 (27.0%)                            | 510 (26.3%)                               |                |
| Some college                                        | 1055 (33.7%)                           | 620 (31.9%)                               |                |
| College graduate or more                            | 816 (26.0%)                            | 527 (27.1%)                               |                |
| Smoking                                             |                                        |                                           | 0.207          |
| Former                                              | 1404 (44.8%)                           | 829 (42.7%)                               |                |

SUPPLEMENTARY DATA

| <b>Baseline characteristics</b>            | <b>Insulin prescribed during study</b> | <b>No insulin prescribed during study</b> | <b>p-value</b> |
|--------------------------------------------|----------------------------------------|-------------------------------------------|----------------|
| Current                                    | 433 (13.8%)                            | 260 (13.4%)                               |                |
| Never                                      | 1298 (41.4%)                           | 853 (43.9%)                               |                |
| Alcohol use                                |                                        |                                           | 0.002          |
| 1-6 drinks/week                            | 2421 (77.3%)                           | 1422 (73.2%)                              |                |
| 7+ drinks/week                             | 582 (18.6%)                            | 411 (21.2%)                               |                |
| No drinks/week                             | 129 (4.1%)                             | 109 (5.6%)                                |                |
| Insulin use (yes vs. no)                   | 1816 (57.9%)                           | 6 (0.3%)                                  | <0.001         |
| ACE inhibitor (yes vs. no)                 | 1765 (56.3%)                           | 935 (48.1%)                               | <0.001         |
| Angiotensin receptor blockers (yes vs. no) | 549 (17.5%)                            | 279 (14.4%)                               | 0.003          |
| Statins (yes vs. no)                       | 2054 (65.5%)                           | 1118 (57.6%)                              | <0.001         |
| Metformin (yes vs. no)                     | 1847 (58.9%)                           | 1200 (61.8%)                              | 0.042          |
| Sulfonylureas (yes vs. no)                 | 1415 (45.1%)                           | 1088 (56.0%)                              | <0.001         |
| Thiazolidinediones (yes vs. no)            | 650 (20.7%)                            | 329 (16.9%)                               | 0.001          |
| BMI (kg/m <sup>2</sup> )                   | 32.8 ± 5.5                             | 31.3 ± 5.3                                | <0.001         |
| Systolic blood pressure (mmHg)             | 136.8 ± 17.5                           | 136.0 ± 16.7                              | 0.109          |
| Diastolic blood pressure (mmHg)            | 74.4 ± 10.7                            | 75.8 ± 10.4                               | <0.001         |
| Visual acuity                              |                                        |                                           | <0.001         |
| <20/40                                     | 765 (25.5%)                            | 393 (21.0%)                               |                |
| 20/20-20/40                                | 1819 (60.6%)                           | 1152 (61.6%)                              |                |
| ≥20/20                                     | 419 (14.0%)                            | 326 (17.4%)                               |                |
| Peripheral neuropathy (yes vs. no)         | 1464 (46.7%)                           | 712 (36.7%)                               | <0.001         |
| Heart rate                                 | 73.1 ± 11.8                            | 71.7 ± 11.6                               | <0.001         |
| Q-T index                                  | 101.7 ± 5.3                            | 101.6 ± 5.0                               | 0.395          |
| A1C in % (mmol/mol)                        | 8.5 ± 1.1<br>(69 ± 12.0)               | 8.1 ± 1.0<br>(65 ± 10.9)                  | <0.001         |
| Fasting plasma glucose (mg/dl)             | 178.6 ± 60.7                           | 170.9 ± 47.9                              | <0.001         |
| LDL (mg/dl)                                | 103.3 ± 33.4                           | 107.5 ± 34.1                              | <0.001         |

SUPPLEMENTARY DATA

| <b>Baseline characteristics</b>                               | <b>Insulin prescribed during study</b> | <b>No insulin prescribed during study</b> | <b>p-value</b> |
|---------------------------------------------------------------|----------------------------------------|-------------------------------------------|----------------|
| HDL (mg/dl)                                                   | 42.0 ± 11.7                            | 41.8 ± 11.1                               | 0.614          |
| Triglycerides (mg/dl)                                         | 189.8 ± 160.2                          | 189.4 ± 127.6                             | 0.924          |
| Serum creatinine (mg/dl)                                      | 0.9 ± 0.2                              | 0.9 ± 0.2                                 | <0.001         |
| Urinary albumin-to-creatinine ratio (mg/mg)                   |                                        |                                           | <0.001         |
| <30                                                           | 2021 (64.5%)                           | 1441 (74.2%)                              |                |
| 30-≤300                                                       | 851 (27.1%)                            | 423 (21.8%)                               |                |
| >300                                                          | 263 (8.4%)                             | 78 (4.0%)                                 |                |
| Integrated health plan (yes vs. no)                           | 1325 (42.3%)                           | 695 (35.8%)                               | <0.001         |
| Endocrinologist or diabetologist (either vs. other physician) | 1860 (59.3%)                           | 977 (50.3%)                               | <0.001         |
| Certified diabetes educator on staff at randomization         | 1248 (39.8%)                           | 707 (36.4%)                               | 0.016          |
| Site size                                                     |                                        |                                           | 0.974          |
| <100                                                          | 474 (15.1%)                            | 295 (15.2%)                               |                |
| 100-150                                                       | 938 (29.9%)                            | 586 (30.2%)                               |                |
| >150                                                          | 1723 (55.0%)                           | 1061 (54.6%)                              |                |

Values are “means ± SD” for continuous variables or “n (%)” for categorical variables.

The sample size for Q-T index is 1759 for those who were never prescribed insulin and 2820 for those who were prescribed insulin. The sample size for A1C is 1936 for those who were never prescribed insulin and 3129 for those who were prescribed insulin.

SUPPLEMENTARY DATA

**Supplementary Table 3. Evaluation of Model 1 in Table 2: The HR for CV mortality of updated, average daily total insulin dose (per 1 unit/ kg)**

| <b>Variable</b>                                       | <b>HR (p-value) for Updated, Average Daily Total Insulin on CV Mortality Adjusted Only For Listed Variable</b> | <b>HR (p-value) for Updated, Average Daily Total Insulin on CV Mortality Adjusted For All Variables Except Listed Variable</b> | <b>HR (p-value) for Updated, Average Daily Total Insulin on CV Mortality – stepwise*</b> |
|-------------------------------------------------------|----------------------------------------------------------------------------------------------------------------|--------------------------------------------------------------------------------------------------------------------------------|------------------------------------------------------------------------------------------|
| Unadjusted                                            | 1.83 (<0.001)                                                                                                  |                                                                                                                                | 1.83 (<0.001)                                                                            |
| Baseline A1c                                          | 1.72 (<0.001)                                                                                                  | 1.27 (0.082)                                                                                                                   | 1.72 (<0.001)                                                                            |
| Heart failure                                         | 1.56 (<0.001)                                                                                                  | 1.31 (0.050)                                                                                                                   | 1.46 (0.002)                                                                             |
| Peripheral neuropathy                                 | 1.71 (<0.001)                                                                                                  | 1.24 (0.131)                                                                                                                   | 1.38 (0.011)                                                                             |
| History of cardiovascular disease                     | 1.61 (<0.001)                                                                                                  | 1.29 (0.072)                                                                                                                   | 1.27 (0.063)                                                                             |
| Albumin-to-creatinine ratio                           | 1.63 (<0.001)                                                                                                  | 1.27 (0.084)                                                                                                                   | 1.19 (0.175)                                                                             |
| Q-T index                                             | 1.69 (<0.001)                                                                                                  | 1.30 (0.047)                                                                                                                   | 1.14 (0.342)                                                                             |
| Amputation                                            | 1.77 (<0.001)                                                                                                  | 1.22 (0.151)                                                                                                                   | 1.13 (0.383)                                                                             |
| Angiotensin receptor blockers                         | 1.87 (<0.001)                                                                                                  | 1.18 (0.234)                                                                                                                   | 1.17 (0.274)                                                                             |
| Serum creatinine                                      | 1.76 (<0.001)                                                                                                  | 1.24 (0.128)                                                                                                                   | 1.14 (0.344)                                                                             |
| Certified diabetes educator on staff at randomization | 1.85 (<0.001)                                                                                                  | 1.20 (0.204)                                                                                                                   | 1.15 (0.318)                                                                             |
| Integrated health plan                                | 1.79 (<0.001)                                                                                                  | 1.23 (0.147)                                                                                                                   | 1.14 (0.360)                                                                             |
| Age                                                   | 1.98 (<0.001)                                                                                                  | 1.12 (0.437)                                                                                                                   | 1.24 (0.126)                                                                             |
| HDL                                                   | 1.76 (<0.001)                                                                                                  | 1.23 (0.151)                                                                                                                   | 1.23 (0.144)                                                                             |
| Education                                             | 1.80 (<0.001)                                                                                                  | 1.23 (0.144) <sup>`</sup>                                                                                                      | 1.21 (0.173) <sup>†</sup>                                                                |

\* stepwise: sequential adjustment; adjust for the variable listed in the row and all the previous variables listed in rows above this variable. Sequence was determined by adding those variables with the smallest p-value, among variables not previously entered in the model.

† Note that the final model containing education is identical to Model 1.
